# Supplementary material
Source: PubMed Central journal article supplement (PMC2504879)
Supplement: M803306200v2_1.pdf [file M803306200v2_1.pdf]

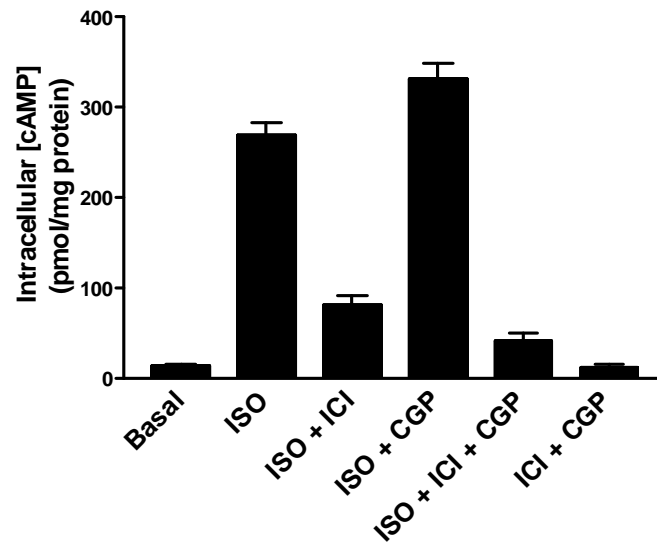

**Supplementary Fig. 1. Isoproterenol-induced cAMP accumulation in MEFs is mediated by the  $\beta_2$ -adrenergic receptor.** Wild type MEFs were incubated for 5 min with different combinations of the  $\beta$ -adrenergic agonist Isoproterenol (ISO, 5  $\mu$ M), the selective  $\beta_2$ -adrenoceptor antagonist ICI118551 (ICI, 1  $\mu$ M), and/or the selective  $\beta_1$ -adrenoceptor antagonist CGP20712A (CGP, 1  $\mu$ M). The cell culture medium was then aspirated and cAMP accumulation was terminated by addition of 0.1% TCA in 95% ethanol. Cyclic AMP concentration in the resulting extracts was measured by RIA.

**Supplementary Figure 1**

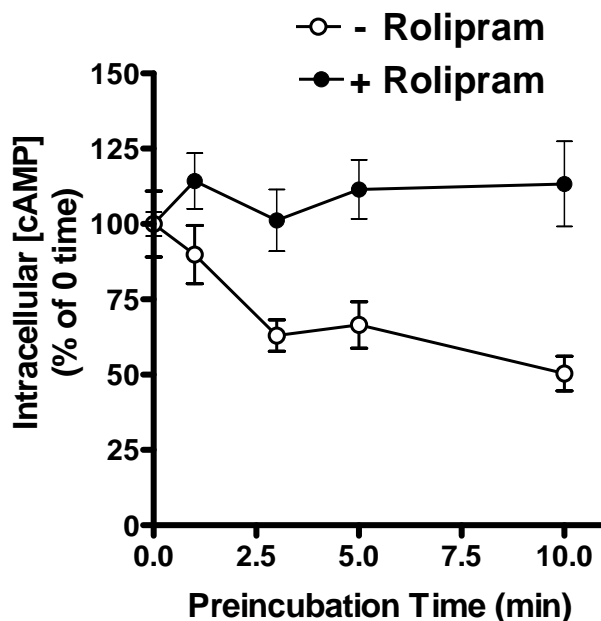

**Supplementary Fig. 2.  $\beta_2$ AR desensitization is altered in the presence of the PDE4-selective inhibitor, Rolipram.** After a 5-min preincubation with 10  $\mu$ M Rolipram, wild type MEFs were pre-stimulated with 10  $\mu$ M ISO for the indicated times after which the medium was removed, cells were washed four times with PBS, and then incubated with 1 mM IBMX for 2 min. Cells were then re-stimulated a second time with 10  $\mu$ M ISO for 2 min after which the incubations were terminated and cAMP concentrations were measured by RIA. Shown is the cAMP accumulation for each preincubation period relative to the amount of cAMP accumulated without ISO pretreatment. Data represent the average of two experiments.
